# Supplementary material for: Dietary Variation and Evolution of Gene Copy Number among Dog Breeds
Source: PubMed Central journal article supplement (PMC4749313; doi:10.1371/journal.pone.0148899), 2016-02-10
Supplement: pone.0148899.s002.pdf [file pone.0148899.s002.pdf]

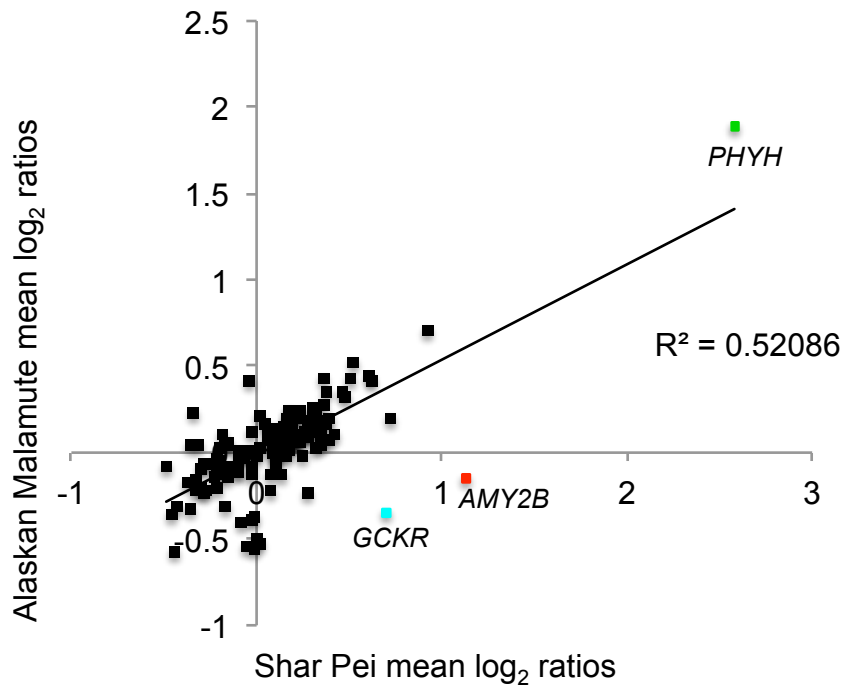

Figure S2. Additional results from analysis of aCGH data. Relationship between Shar Pei and Alaskan malamute mean log<sub>2</sub> ratios for 157 copy number variable sites in the dog genome. *GCKR* deviates from the null distribution. The location of *PHYH* likely reflects error in ddPCR measurements due to high copy number.
