# Supplementary material for: Dietary Variation and Evolution of Gene Copy Number among Dog Breeds
Source: PubMed Central journal article supplement (PMC4749313; doi:10.1371/journal.pone.0148899), 2016-02-10
Supplement: pone.0148899.s005.pdf [file pone.0148899.s005.pdf]

**Table S1.** Changes in *GCKR* copy number relative to the reference sequence CanFam2, and diabetes odds risk for specific breeds.

| Breed            | # Gain | # Same | # Loss | Diabetes Odds Risk                    |
|------------------|--------|--------|--------|---------------------------------------|
| Pekingese        | 12     | 1      | 2      | .18 <sup>a</sup>                      |
| Shar Pei         | 8      | 0      | 0      | n/a <sup>b</sup>                      |
| Akita            | 7      | 0      | 0      | n/a <sup>b</sup>                      |
| Shiba Inu        | 4      | 0      | 0      | n/a <sup>b</sup>                      |
| Siberian Husky   | 14     | 0      | 1      | 1.53 <sup>c</sup> ; 3.46 <sup>d</sup> |
| Alaskan Malamute | 5      | 1      | 7      | No increased risk <sup>e</sup>        |

Number of dogs in each breed with a gain, the same, or a loss of copy number in *GCKR* compared to the reference sequence CanFam2. <sup>a,c,e</sup>(1), <sup>b</sup>no available data on diabetes odds risk, <sup>d</sup>(2)

1. Guptill L, Glickman L, Glickman N. Time trends and risk factors for diabetes mellitus in dogs: analysis of veterinary medical data base records (1970-1999). *Veterinary journal* (London, England : 1997). 2003;165(3):240-7.
2. Catchpole B, Adams JP, Holder AL, Short AD, Ollier WE, Kennedy LJ. Genetics of canine diabetes mellitus: are the diabetes susceptibility genes identified in humans involved in breed susceptibility to diabetes mellitus in dogs? *Veterinary journal* (London, England : 1997). 2013;195(2):139-47.
