# Supplementary material for: Dietary Variation and Evolution of Gene Copy Number among Dog Breeds
Source: PubMed Central journal article supplement (PMC4749313; doi:10.1371/journal.pone.0148899), 2016-02-10
Supplement: pone.0148899.s006.pdf [file pone.0148899.s006.pdf]

Table S2. Frequency of Derived Allele in *AMYB2*  
Ancestry Informative SNPs for High and Low Starch  
Dog Breeds

| aiSNP                | Breed               | Starch | Dfreq |
|----------------------|---------------------|--------|-------|
| <b>chr6.50074785</b> | Pekingese           | High   | 1     |
|                      | Saluki              | High   | 1     |
|                      | SharPei             | High   | 0.29  |
|                      | ShihTzu             | High   | 1     |
|                      | Akita               | Low    | 1     |
|                      | AlaskanMalamute     | Low    | 0.59  |
|                      | American Eskimo Dog | Low    | 1     |
|                      | SiberianHusky       | Low    | 0.29  |
| <b>chr6.50081582</b> | Pekingese           | High   | 1     |
|                      | Saluki              | High   | 1     |
|                      | SharPei             | High   | 0.29  |
|                      | ShihTzu             | High   | 1     |
|                      | Akita               | Low    | 1     |
|                      | AlaskanMalamute     | Low    | 0.59  |
|                      | American Eskimo Dog | Low    | 1     |
|                      | SiberianHusky       | Low    | 0.29  |
| <b>chr6.50089070</b> | Pekingese           | High   | 1     |
|                      | Saluki              | High   | 1     |
|                      | SharPei             | High   | 0.29  |
|                      | Shihtzu             | High   | 1     |
|                      | Akita               | Low    | 1     |
|                      | AlaskanMalamute     | Low    | 0.59  |
|                      | American Eskimo Dog | Low    | 1     |
|                      | SiberianHusky       | Low    | 0.29  |

Column headings: aiSNP-location of the ancestry informative snp; Breed- name of dog breed; Starch- High or low starch consumption; Dfreq- derived allele frequency.
