# Supplementary material for: Dietary Variation and Evolution of Gene Copy Number among Dog Breeds
Source: PubMed Central journal article supplement (PMC4749313; doi:10.1371/journal.pone.0148899), 2016-02-10
Supplement: pone.0148899.s007.pdf [file pone.0148899.s007.pdf]

Table S3. Frequency of Derived Allele in *GKCR* Ancestry Informative SNPs in High and Low Starch Dog Breeds

| aiSNP          | Breed               | Starch | Dfreq |
|----------------|---------------------|--------|-------|
| chr17.24309172 | Pekingese           | High   | 0.77  |
|                | Saluki              | High   | 0.75  |
|                | Shar Pei            | High   | 0.75  |
|                | Shih Tzu            | High   | 0.90  |
|                | Akita               | Low    | 1     |
|                | Alaskan Malamute    | Low    | 1     |
|                | American Eskimo Dog | Low    | 0.50  |
|                | Siberian Husky      | Low    | 0.14  |
| chr17.24312880 | Pekingese           | High   | 0.77  |
|                | Saluki              | High   | 0.59  |
|                | Shar Pei            | High   | 0.70  |
|                | Shih Tzu            | High   | 0.89  |
|                | Akita               | Low    | 1     |
|                | Alaskan Malamute    | Low    | 1     |
|                | American Eskimo Dog | Low    | 0.60  |
|                | Siberian Husky      | Low    | 0.14  |
| chr17.25295979 | Pekingese           | High   | 0.20  |
|                | Saluki              | High   | 0.73  |
|                | Shar Pei            | High   | 0.92  |
|                | Shih Tzu            | High   | 0.33  |
|                | Akita               | Low    | 0.95  |
|                | Alaskan Malamute    | Low    | 0.14  |
|                | American Eskimo Dog | Low    | 0.93  |
|                | Siberian Husky      | Low    | 0.32  |

Column headings: aiSNP-location of the ancestry informative snp; Breed- name of dog breed; Starch- High or low starch consumption; Dfreq- derived allele frequency.
