# Supplementary material for: Dietary Variation and Evolution of Gene Copy Number among Dog Breeds
Source: PubMed Central journal article supplement (PMC4749313; doi:10.1371/journal.pone.0148899), 2016-02-10
Supplement: pone.0148899.s008.pdf [file pone.0148899.s008.pdf]

Table S4. Frequency of Derived Allele in *PHYH* Ancestry Informative SNPs in High and Low Starch Dog Breeds

| <b>aiSNP</b>  | <b>Breed</b>        | <b>Starch</b> | <b>Dfreq</b> |
|---------------|---------------------|---------------|--------------|
| chr2.25670153 | Pekingese           | High          | 0.36         |
|               | Saluki              | High          | 0.38         |
|               | Shar Pei            | High          | 0.58         |
|               | Shih Tzu            | High          | 1            |
|               | Akita               | Low           | 0.38         |
|               | Alaskan Malamute    | Low           | 0.45         |
|               | American Eskimo Dog | Low           | 0.50         |
|               | Siberian Husky      | Low           | 0.96         |

Column headings: aiSNP-location of the ancestry informative snp; Breed- name of dog breed; Starch- High or low starch consumption; Dfreq- derived allele frequency.
