# Supplementary material for: Dietary Variation and Evolution of Gene Copy Number among Dog Breeds
Source: PubMed Central journal article supplement (PMC4749313; doi:10.1371/journal.pone.0148899), 2016-02-10
Supplement: pone.0148899.s009.pdf [file pone.0148899.s009.pdf]

**Table S5. Traditional dietary intake of specific dog breeds.**

| Breed               | Subsistence                         | Dietary Starch                                                                                                                                                                                 |
|---------------------|-------------------------------------|------------------------------------------------------------------------------------------------------------------------------------------------------------------------------------------------|
| Chinese Shar Pei    | Horticulture/cereal agriculture     | Pre agriculture: sago palms, banana, water chestnuts, lotus roots, arrowheads, ferns, Job's tears, acorns, sedge, bamboo some rice (1). Post horticulture/ agriculture: Rice, Chinese yam (2). |
| Pekingese           | Gathering, cereal agriculture       | Pre agriculture: acorn, foxtail millet, oak species, broomcorn, bean, roots, grasses, deer (3). Post agriculture: millet (4).                                                                  |
| Akita and Shiba Inu | Hunter-gathering/cereal agriculture | Jōmon: limited bottle gourd, mung beans, millet, barley, burdock, rice, fish (5); Agriculturalists: rice cultivation (5); Ainu: seasonally available vegetables, fish, deer (6).               |
| Siberian Husky      | Hunter-gathering                    | Reindeer, freshwater fish (7, 8).                                                                                                                                                              |
| Alaskan Malamute    | Hunter-gathering                    | Whale, seal, caribou, salmon, whitefish, saffron cod, northern pike, arctic grayling, burbot, and Pacific herring (7, 9).                                                                      |

#### References

1. Yang X, Barton HJ, Wan Z, Li Q, Ma Z, Li M, et al. Sago-Type Palms Were an Important Plant Food Prior to Rice in Southern Subtropical China. *PloS one*. 2013;8(5):e63148.
2. Weng Q. Human-environment interactions in agricultural land use in a South China's wetland region: A study on the Zhujiang Delta in the Holocene. *GeoJournal*. 2000;51(3):191-202.
3. Yang X, Yu J, Lü H, Cui T, Guo J, Ge Q. Starch grain analysis reveals function of grinding stone tools at Shangzhai site, Beijing. *Sci China Ser D-Earth Sci*. 2009;52(8):1164-71.
4. Pechenkina EA, Ambrose SH, Xiaolin M, Benfer Jr RA. Reconstructing northern Chinese Neolithic subsistence practices by isotopic analysis. *Journal of Archaeological Science*. 2005;32(8):1176-89.
5. Habu J. *Ancient Jomon of Japan*. Cambridge, UK: Cambridge University Press; 2004. 350 p.
6. Shinichiro T. *The Ainu of northern Japan : a study in conquest and acculturation*. Philadelphia: American Philosophical Society; 1960.
7. Porsild AE. *Edible Plants of the Arctic*. 1953. 1953;6(1).
8. Kozlov A, Vershubsky G, Kozlova M. *Indigenous Peoples of Northern Russia: Anthropology and Health*. 2007.
9. Driver H. *Indians of North America*. 2 ed. Chicago: University of Chicago Press; 1969.
