# Supplementary material for: Dietary Variation and Evolution of Gene Copy Number among Dog Breeds
Source: PubMed Central journal article supplement (PMC4749313; doi:10.1371/journal.pone.0148899), 2016-02-10
Supplement: pone.0148899.s010.pdf [file pone.0148899.s010.pdf]

**Table S6:** Diploid *AMY2B* copy number and technical error estimates from ddPCR

| Breed            | Sample | Diploid<br><i>AMY2B</i> CN<br>Estimate | Diploid<br><i>AMY2B</i><br>CN | Poisson<br>Max CN<br>Estimate* | Poisson<br>Min CN<br>Estimate* |
|------------------|--------|----------------------------------------|-------------------------------|--------------------------------|--------------------------------|
| Alaskan malamute | AM-1   | 1.93                                   | 2                             | 2.14                           | 1.8                            |
| Alaskan malamute | AM-2   | 10.28                                  | 10                            | 10.82                          | 9.86                           |
| Alaskan malamute | AM-3   | 2.04                                   | 2                             | 2.26                           | 1.95                           |
| Alaskan malamute | AM-4   | 15.8                                   | 16                            | 17.3                           | 15.1                           |
| Alaskan malamute | AM-5   | 9.4                                    | 9                             | 10                             | 8.2                            |
| Alaskan malamute | AM-6   | 1.97                                   | 2                             | 2.13                           | 1.87                           |
| Alaskan malamute | AM-7   | 1.81                                   | 2                             | 2.07                           | 1.65                           |
| Alaskan malamute | AM-8   | 9                                      | 9                             | 9.5                            | 8.4                            |
| Alaskan malamute | AM-9   | 3.25                                   | 3                             | 3.35                           | 3                              |
| Alaskan malamute | AM-10  | 2.87                                   | 3                             | 3.02                           | 2.71                           |
| Alaskan malamute | AM-11  | 2.9                                    | 3                             | 3.04                           | 2.74                           |
| Alaskan malamute | AM-12  | 8.93                                   | 9                             | 9.46                           | 8.53                           |
| Alaskan malamute | AM-13  | 1.88                                   | 2                             | 2.1                            | 1.74                           |
| Shar Pei         | CSP-1  | 11.8                                   | 12                            | 11.4                           | 8.6                            |
| Shar Pei         | CSP-2  | 9.4                                    | 9                             | 10.7                           | 8.5                            |
| Shar Pei         | CSP-3  | 13.6                                   | 14                            | 15.5                           | 10.2                           |
| Shar Pei         | CSP-4  | 12.7                                   | 13                            | 13.2                           | 10.4                           |
| Shar Pei         | CSP-5  | 9.3                                    | 9                             | 11.8                           | 9.7                            |
| Shar Pei         | CSP-6  | 10.6                                   | 11                            | 15.1                           | 11                             |
| Shar Pei         | CSP-7  | 8.6                                    | 9                             | 9.9                            | 7.2                            |
| Shar Pei         | CSP-8  | 11.2                                   | 11                            | 12.1                           | 12.1                           |
| Japanese         | AK-1   | 9.9                                    | 10                            | 10.1                           | 9.1                            |
| Japanese         | SI-1   | 1.81                                   | 2                             | 2.11                           | 1.73                           |
| Japanese         | SI-2   | 10                                     | 10                            | 10.6                           | 9.4                            |
| Japanese         | SI-3   | 2                                      | 2                             | 2.15                           | 1.94                           |
| Japanese         | SI-4   | 11.8                                   | 12                            | 13                             | 10.5                           |
| Japanese         | AK-2   | 12.6                                   | 13                            | 13.7                           | 11.5                           |
| Japanese         | AK-3   | 9.5                                    | 10                            | 10.2                           | 8.9                            |
| Japanese         | AK-4   | 8.93                                   | 9                             | 9.4                            | 8.46                           |
| Japanese         | AK-5   | 8.1                                    | 8                             | 8.45                           | 7.74                           |
| Japanese         | AK-6   | 7.6                                    | 8                             | 8.3                            | 6.9                            |
| Japanese         | AK-7   | 12.3                                   | 12                            | 13                             | 11.7                           |
| Pekingese        | PK-1   | 10.1                                   | 10                            | 12                             | 8.6                            |
| Pekingese        | PK-2   | 9.9                                    | 10                            | 11.3                           | 9.6                            |
| Pekingese        | PK-3   | 9                                      | 9                             | 11.1                           | 8.4                            |
| Pekingese        | PK-4   | 11                                     | 11                            | 13.3                           | 11.2                           |
| Pekingese        | PK-5   | 12.1                                   | 12                            | 13.9                           | 10.3                           |
| Pekingese        | PK-6   | 9.5                                    | 10                            | 10.6                           | 8.5                            |
| Pekingese        | PK-7   | 10.1                                   | 10                            | 11.4                           | 9                              |

|                |       |      |    |       |      |
|----------------|-------|------|----|-------|------|
| Pekingese      | PK-8  | 8.7  | 9  | 10    | 7.9  |
| Pekingese      | PK-9  | 12.1 | 12 | 12.1  | 10.4 |
| Pekingese      | PK-10 | 11.5 | 12 | 11.1  | 8.1  |
| Pekingese      | PK-11 | 10.9 | 11 | 11.9  | 10.7 |
| Pekingese      | PK-12 | 10.4 | 10 | 11.6  | 8.9  |
| Pekingese      | PK-13 | 7    | 7  | 8.8   | 5.4  |
| Pekingese      | PK-14 | 12.2 | 12 | 12.8  | 11.3 |
| Pekingese      | PK-15 | 10.9 | 11 | 11.6  | 9.7  |
| Siberian husky | SH-1  | 4.1  | 4  | 4.18  | 3.76 |
| Siberian husky | SH-2  | 15.5 | 15 | 15.4  | 14.1 |
| Siberian husky | SH-3  | 9.13 | 9  | 9.18  | 8.54 |
| Siberian husky | SH-4  | 4.12 | 4  | 4.13  | 3.83 |
| Siberian husky | SH-5  | 9.57 | 10 | 9.81  | 8.96 |
| Siberian husky | SH-6  | 10.6 | 11 | 10.99 | 10   |
| Siberian husky | SH-7  | 13.2 | 13 | 13.9  | 12.7 |
| Siberian husky | SH-8  | 6.83 | 7  | 7.09  | 6.56 |
| Siberian husky | SH-9  | 12.9 | 13 | 14.1  | 12.4 |
| Siberian husky | SH-10 | 8.9  | 9  | 9.4   | 8.2  |
| Siberian husky | SH-11 | 9.89 | 10 | 10.4  | 9.44 |
| Siberian husky | SH-12 | 7.15 | 7  | 7.3   | 6.45 |
| Siberian husky | SH-13 | 5.37 | 5  | 5.43  | 5.01 |
| Siberian husky | SH-14 | 2.02 | 2  | 2.1   | 1.94 |
| Siberian husky | SH-15 | 4.18 | 4  | 4.38  | 4    |

\*Droplet Digital PCR generates maximum and minimum technical error estimates from one replicate.
