# Supplementary material for: Dietary Variation and Evolution of Gene Copy Number among Dog Breeds
Source: PubMed Central journal article supplement (PMC4749313; doi:10.1371/journal.pone.0148899), 2016-02-10
Supplement: pone.0148899.s011.pdf [file pone.0148899.s011.pdf]

**Table S7:** Diploid *GCKR* copy number and technical error estimates from ddPCR

| Breed            | Sample | Diploid<br><i>GCKR</i> CN<br>Estimate | Diploid<br><i>GCKR</i> CN | Poisson<br>Max CN<br>Estimate* | Poisson<br>Min CN<br>Estimate* |
|------------------|--------|---------------------------------------|---------------------------|--------------------------------|--------------------------------|
| Alaskan malamute | AM-1   | 6.01                                  | 6                         | 7.8                            | 5.4                            |
| Alaskan malamute | AM-2   | 3.65                                  | 4                         | 8.3                            | 6.9                            |
| Alaskan malamute | AM-3   | 3.49                                  | 3                         | 10.9                           | 8                              |
| Alaskan malamute | AM-4   | 4.50                                  | 5                         | 10                             | 8.7                            |
| Alaskan malamute | AM-5   | 3.80                                  | 4                         | 7.6                            | 5.5                            |
| Alaskan malamute | AM-6   | 4.29                                  | 4                         | 11.6                           | 9.1                            |
| Alaskan malamute | AM-7   | 4.40                                  | 4                         | 8.1                            | 6.3                            |
| Alaskan malamute | AM-8   | 4.05                                  | 4                         | 5.2                            | 4.1                            |
| Alaskan malamute | AM-9   | 3.34                                  | 3                         | 13.5                           | 6.5                            |
| Alaskan malamute | AM-10  | 7.90                                  | 8                         | 3.9                            | 2.2                            |
| Alaskan malamute | AM-11  | 6.27                                  | 6                         | 6.32                           | 5.58                           |
| Alaskan malamute | AM-12  | 6.20                                  | 6                         | 11                             | 7.5                            |
| Alaskan malamute | AM-13  | 6.90                                  | 7                         | 11.1                           | 6                              |
| Shar Pei         | CSP-1  | 8.40                                  | 8                         | 6.9                            | 5.6                            |
| Shar Pei         | CSP-2  | 10.70                                 | 11                        | 4.7                            | 3.4                            |
| Shar Pei         | CSP-3  | 7.30                                  | 7                         | 6.28                           | 5.47                           |
| Shar Pei         | CSP-4  | 11.30                                 | 11                        | 6.49                           | 5.53                           |
| Shar Pei         | CSP-5  | 8.50                                  | 9                         | 10.8                           | 6.1                            |
| Shar Pei         | CSP-6  | 15.00                                 | 15                        | 13.4                           | 8                              |
| Shar Pei         | CSP-7  | 6.70                                  | 7                         | 9.1                            | 5.6                            |
| Shar Pei         | CSP-8  | 12.60                                 | 13                        | 14                             | 8.6                            |
| Japanese         | AK-1   | 5.88                                  | 6                         | 9.9                            | 7.2                            |
| Japanese         | SI-1   | 5.90                                  | 6                         | 20                             | 10                             |
| Japanese         | SI-2   | 6.00                                  | 6                         | 7.9                            | 5.6                            |
| Japanese         | SI-3   | 9.50                                  | 10                        | 14.1                           | 11                             |
| Japanese         | SI-4   | 5.40                                  | 5                         | 7                              | 4.8                            |
| Japanese         | AK-2   | 5.90                                  | 6                         | 6.8                            | 5.7                            |
| Japanese         | AK-3   | 5.56                                  | 6                         | 10.2                           | 8.9                            |
| Japanese         | AK-4   | 9.20                                  | 9                         | 6.3                            | 4.5                            |
| Japanese         | AK-5   | 8.60                                  | 9                         | 3.99                           | 3.3                            |
| Japanese         | AK-6   | 6.50                                  | 7                         | 3.8                            | 3.18                           |
| Japanese         | AK-7   | 7.00                                  | 7                         | 5.2                            | 3.9                            |
| Pekingese        | PK-1   | 6.60                                  | 7                         | 4.4                            | 3.2                            |
| Pekingese        | PK-2   | 7.60                                  | 8                         | 4.62                           | 3.96                           |
| Pekingese        | PK-3   | 9.40                                  | 9                         | 5.2                            | 3.7                            |
| Pekingese        | PK-4   | 9.40                                  | 9                         | 4.41                           | 3.69                           |
| Pekingese        | PK-5   | 6.50                                  | 7                         | 3.54                           | 3.13                           |
| Pekingese        | PK-6   | 10.30                                 | 10                        | 14.5                           | 12.6                           |
| Pekingese        | PK-7   | 7.20                                  | 7                         | 9.85                           | 8.91                           |

|                |       |       |    |      |      |
|----------------|-------|-------|----|------|------|
| Pekingese      | PK-8  | 4.70  | 5  | 8.35 | 7.46 |
| Pekingese      | PK-9  | 10.00 | 10 | 11   | 9.8  |
| Pekingese      | PK-10 | 3.00  | 3  | 12.1 | 10.5 |
| Pekingese      | PK-11 | 5.95  | 6  | 11.6 | 9.9  |
| Pekingese      | PK-12 | 9.30  | 9  | 12   | 10.4 |
| Pekingese      | PK-13 | 8.50  | 9  | 11.5 | 10.2 |
| Pekingese      | PK-14 | 6.30  | 6  | 23   | 6    |
| Pekingese      | PK-15 | 4.10  | 4  | 16.4 | 12.2 |
| Siberian husky | SH-1  | 13.60 | 14 | 8.8  | 7.4  |
| Siberian husky | SH-2  | 9.38  | 9  | 12.3 | 10.5 |
| Siberian husky | SH-3  | 7.91  | 8  | 10.9 | 9.8  |
| Siberian husky | SH-4  | 10.40 | 10 | 4.27 | 3.81 |
| Siberian husky | SH-5  | 11.30 | 11 | 13.8 | 12.1 |
| Siberian husky | SH-6  | 10.80 | 11 | 8.5  | 7.2  |
| Siberian husky | SH-7  | 11.20 | 11 | 6.76 | 5.77 |
| Siberian husky | SH-8  | 10.90 | 11 | 6.8  | 5.6  |
| Siberian husky | SH-9  | 14.00 | 14 | 7.5  | 6.3  |
| Siberian husky | SH-10 | 14.30 | 14 | 6.4  | 5.4  |
| Siberian husky | SH-11 | 8.10  | 8  | 6.01 | 5.11 |
| Siberian husky | SH-12 | 11.40 | 11 | 9.7  | 8.6  |
| Siberian husky | SH-13 | 10.40 | 10 | 9.1  | 8    |
| Siberian husky | SH-14 | 4.04  | 4  | 7    | 5.9  |
| Siberian husky | SH-15 | 12.90 | 13 | 7.6  | 6.3  |

\*Droplet Digital PCR generates maximum and minimum technical error estimates from one replicate.
