# Supplementary material for: Dietary Variation and Evolution of Gene Copy Number among Dog Breeds
Source: PubMed Central journal article supplement (PMC4749313; doi:10.1371/journal.pone.0148899), 2016-02-10
Supplement: pone.0148899.s012.pdf [file pone.0148899.s012.pdf]

**Table S8:** Diploid *PHYH* copy number and technical error estimates from ddPCR

| Breed            | Sample | Diploid<br><i>PHYH</i> CN<br>Estimate | Diploid<br><i>PHYH</i> CN | Poisson<br>Max CN<br>Estimate* | Poisson<br>Min CN<br>Estimate* |
|------------------|--------|---------------------------------------|---------------------------|--------------------------------|--------------------------------|
| Alaskan malamute | AM-1   | 8.1                                   | 8                         | 9.2                            | 7.1                            |
| Alaskan malamute | AM-2   | 13.3                                  | 13                        | 15                             | 11.6                           |
| Alaskan malamute | AM-3   | 10.0                                  | 10                        | 11.6                           | 8.5                            |
| Alaskan malamute | AM-4   | 5.9                                   | 6                         | 6.9                            | 4.9                            |
| Alaskan malamute | AM-5   | 11.5                                  | 12                        | 13.3                           | 9.6                            |
| Alaskan malamute | AM-6   | 8.5                                   | 9                         | 9.2                            | 7.8                            |
| Alaskan malamute | AM-7   | 9.1                                   | 9                         | 11.2                           | 7                              |
| Alaskan malamute | AM-8   | 7.5                                   | 8                         | 8.1                            | 6.8                            |
| Alaskan malamute | AM-9   | 14.6                                  | 15                        | 16                             | 13.2                           |
| Alaskan malamute | AM-10  | 25.5                                  | 26                        | 27                             | 24.1                           |
| Alaskan malamute | AM-11  | 10.1                                  | 10                        | 11                             | 9.1                            |
| Alaskan malamute | AM-12  | 14.7                                  | 15                        | 16.6                           | 12.8                           |
| Alaskan malamute | AM-13  | 13.8                                  | 14                        | 16.4                           | 11.2                           |
| Shar Pei         | CSP-1  | 24.0                                  | 24                        | 30                             | 18                             |
| Shar Pei         | CSP-2  | 27.0                                  | 27                        | 34                             | 20                             |
| Shar Pei         | CSP-3  | 13.4                                  | 13                        | 17.4                           | 9.5                            |
| Shar Pei         | CSP-4  | 25.2                                  | 25                        | 29.9                           | 20.4                           |
| Shar Pei         | CSP-5  | 17.1                                  | 17                        | 21.3                           | 12.8                           |
| Shar Pei         | CSP-6  | 25.0                                  | 25                        | 56                             | 16                             |
| Shar Pei         | CSP-7  | 14.7                                  | 15                        | 18.1                           | 11.4                           |
| Shar Pei         | CSP-8  | 8.1                                   | 8                         | 10.1                           | 6                              |
| Japanese         | AK-1   | 13.1                                  | 13                        | 14.1                           | 12.1                           |
| Japanese         | SI-1   | 16.9                                  | 17                        | 20.7                           | 13.1                           |
| Japanese         | SI-2   | 18.0                                  | 18                        | 24                             | 13                             |
| Japanese         | SI-3   | 16.4                                  | 16                        | 18.3                           | 14.4                           |
| Japanese         | SI-4   | 13.9                                  | 14                        | 18.3                           | 9.5                            |
| Japanese         | AK-2   | 31.5                                  | 32                        | 35                             | 27.9                           |
| Japanese         | AK-3   | 24.7                                  | 25                        | 26.3                           | 23                             |
| Japanese         | AK-4   | 22.0                                  | 22                        | 23                             | 20.7                           |
| Japanese         | AK-5   | 32.1                                  | 32                        | 33.9                           | 30.2                           |
| Japanese         | AK-6   | 29.3                                  | 29                        | 32.8                           | 25.9                           |
| Japanese         | AK-7   | 34.4                                  | 34                        | 37.9                           | 30.9                           |
| Pekingese        | PK-1   | 16.5                                  | 17                        | 17.8                           | 15.3                           |
| Pekingese        | PK-2   | 13.6                                  | 14                        | 14.4                           | 12.8                           |
| Pekingese        | PK-3   | 14.5                                  | 15                        | 16.5                           | 12.4                           |
| Pekingese        | PK-4   | 16.5                                  | 17                        | 17.6                           | 15.4                           |
| Pekingese        | PK-5   | 11.4                                  | 11                        | 12.7                           | 10.2                           |
| Pekingese        | PK-6   | 9.5                                   | 10                        | 11.2                           | 7.8                            |
| Pekingese        | PK-7   | 9.5                                   | 10                        | 10.5                           | 8.5                            |

|                |       |      |    |      |      |
|----------------|-------|------|----|------|------|
| Pekingese      | PK-8  | 9.8  | 10 | 11.1 | 8.5  |
| Pekingese      | PK-9  | 13.2 | 13 | 14.9 | 11.4 |
| Pekingese      | PK-10 | 11.1 | 11 | 13.2 | 9    |
| Pekingese      | PK-11 | 14.1 | 14 | 14.9 | 13.3 |
| Pekingese      | PK-12 | 17.2 | 17 | 20.4 | 14   |
| Pekingese      | PK-13 | 16.0 | 16 | 23   | 10   |
| Pekingese      | PK-14 | 11.2 | 11 | 12.1 | 10.3 |
| Pekingese      | PK-15 | 18.5 | 19 | 21.5 | 15.6 |
| Siberian husky | SH-1  | 14.6 | 15 | 16   | 13.2 |
| Siberian husky | SH-2  | 15.8 | 16 | 17.3 | 14.3 |
| Siberian husky | SH-3  | 13.3 | 13 | 14.6 | 11.9 |
| Siberian husky | SH-4  | 14.8 | 15 | 15.7 | 13.8 |
| Siberian husky | SH-5  | 16.3 | 16 | 17.5 | 15   |
| Siberian husky | SH-6  | 14.3 | 14 | 15.6 | 12.9 |
| Siberian husky | SH-7  | 9.3  | 9  | 10.2 | 8.5  |
| Siberian husky | SH-8  | 14.7 | 15 | 15.9 | 13.5 |
| Siberian husky | SH-9  | 18.0 | 18 | 20.6 | 15.4 |
| Siberian husky | SH-10 | 20.5 | 21 | 22.6 | 18.3 |
| Siberian husky | SH-11 | 20.9 | 21 | 23.1 | 18.7 |
| Siberian husky | SH-12 | 10.5 | 11 | 11.4 | 9.5  |
| Siberian husky | SH-13 | 21.8 | 22 | 23.3 | 20.2 |
| Siberian husky | SH-14 | 12.3 | 12 | 13   | 11.5 |
| Siberian husky | SH-15 | 11.5 | 12 | 12.2 | 10.8 |

\*Droplet Digital PCR generates maximum and minimum technical error estimates from one replicate.
