# Supplementary material for: Dietary Variation and Evolution of Gene Copy Number among Dog Breeds
Source: PubMed Central journal article supplement (PMC4749313; doi:10.1371/journal.pone.0148899), 2016-02-10
Supplement: pone.0148899.s013.pdf [file pone.0148899.s013.pdf]

**Table S9. Primer and Probe sequences used for ddPCR assays for target and reference genes.**

| Target Gene  | Forward Primer                    | Reverse Primer                    | Probe                              | Reference Gene  | Forward Primer                   | Reverse Primer                     | Probe                                |
|--------------|-----------------------------------|-----------------------------------|------------------------------------|-----------------|----------------------------------|------------------------------------|--------------------------------------|
| <i>AMY2B</i> | ccaaacctggacggacatct              | tatcggtcgcattcaagagcaa            | (FAM/MGB)<br>tttgagtggcgctgg       | <i>C7orf28B</i> | ttgtgcaggatcagagcatc             | caacacaggttgaccaagga               | (VIC/TAMRA)<br>tgccatttgtgtgca tcccc |
| <i>GCKR</i>  | gctctaccctcctctaa<br>ttccgta      | ttggaggatcttccaaga<br>agca        | (MGB/VIC)<br>taagcaccaagtgatact    | <i>CFTR</i>     | ttgcatactgtatct<br>actttgttctgtt | ctgattcactggataaattat<br>gagcctagt | (MGB/FAM)<br>cagagctgcac<br>ctattc   |
| <i>PHYH</i>  | acagtaatgacatcat<br>ctgccaatttcat | gcaatggacacatctctca<br>ttatcatcat | (MGB/VIC)<br>accagttgaaag<br>gatct | <i>CFTR</i>     | ttgcatactgtatct<br>actttgttctgtt | ctgattcactggataaattat<br>gagcctagt | (MGB/FAM)<br>cagagctgcac<br>ctattc   |
