# Supplementary material for: Dietary Variation and Evolution of Gene Copy Number among Dog Breeds
Source: PubMed Central journal article supplement (PMC4749313; doi:10.1371/journal.pone.0148899), 2016-02-10
Supplement: pone.0148899.s014.pdf [file pone.0148899.s014.pdf]

Table S10. Considered coordinates and location of ancestry informative SNPs for *AMY2B*, *GCKR*, and *PHYH*.

| Gene         | Coordinates <sup>1</sup> | Expanded Coordinates <sup>2</sup> | ai.SNPs <sup>3</sup>                               |
|--------------|--------------------------|-----------------------------------|----------------------------------------------------|
| <i>GCKR</i>  | chr17:24411781- 24887707 | chr17:23911781-25387707           | chr17.24309172<br>chr17.24312880<br>chr17.25295979 |
| <i>PHYH</i>  | chr2:25986659-26125955   | chr2:25486659-26625955            | chr2.25670153                                      |
| <i>AMY2B</i> | chr6:49348429-50097961   | chr6:48848429-50597961            | chr6.50074785<br>chr6.50081582<br>chr.50089070     |

<sup>1</sup>These coordinates range from the transcription start site of the nearest non-overlapping 5' and 3' flanking genes according to the UCSC genome browser using the CanFam2 build.

<sup>2</sup>Consistent with Vonholdt et al. (2010), these coordinates expand the previous column by 500kb on each side to include the full potential range of an introgressed haplotype.

<sup>3</sup>ai.SNPs refer to ancestry informative SNPs. Defined by an absolute value  $\Delta$ DAF between dogs and wolves greater than two standard deviations from the genome-wide mean.
